# Supplementary material
Source: PubMed Central journal article supplement (PMC7366782)
Supplement: NIHMS1594778-supplement-Supplementary_Material.pdf [file NIHMS1594778-supplement-Supplementary_Material.pdf]

## Supplementary Data

### Radiologic evidence that hypothalamic gliosis is improved after bariatric surgery in obese women with type 2 diabetes

Simone van de Sande-Lee<sup>1</sup>, Susan J. Melhorn<sup>2</sup>, Briana Rachid<sup>1</sup>, Sylka Rodovalho<sup>1</sup>, José C. De-Lima-Junior<sup>1</sup>, Brunno M. Campos<sup>3</sup>, Tatiane Pedro<sup>3</sup>, Guilherme C. Beltramini<sup>4</sup>, Eliton A. Chaim<sup>5</sup>, Jose C. Pareja<sup>5</sup>, Fernando Cendes<sup>3</sup>, Kenneth R. Maravilla<sup>6</sup>, Ellen A. Schur<sup>2</sup>, Licio A. Velloso<sup>1</sup>

|                        | Controls of Healthy Weight (N=13) | Non-Diabetics with Obesity (N=19) | Type 2 Diabetics with Obesity (N=14) | P-value of statistical model |
|------------------------|-----------------------------------|-----------------------------------|--------------------------------------|------------------------------|
| Age, y                 | 30.1 (7.0)                        | 35.7 (8.0)                        | 40.7 (5.3)*                          | 0.001 <sup>†</sup>           |
| Weight, kg             | 54.8 (6.2)                        | 105.7 (11.3)*                     | 116.6 (6.7)* <sup>§</sup>            | <0.0001 <sup>†</sup>         |
| BMI, kg/m <sup>2</sup> | 21.4 (2.0)                        | 40.3 (5.2)*                       | 45.2 (3.4)* <sup>§</sup>             | <0.0001 <sup>†</sup>         |
| Fasting glucose, mg/dl | 78.2 (8.5)                        | 83.8 (6.7)                        | 110.8 (26.2)* <sup>§</sup>           | <0.0001 <sup>†</sup>         |
| Fasting insulin, uU/ml | 4.3 (2.0–5.4)                     | 8.7 (6.5–12.0)*                   | 28.2 (14.6–38.5)* <sup>§</sup>       | 0.0001 <sup>†</sup>          |
| HbA1c, %               | 5.2 (0.3)                         | 5.5 (0.4)                         | 6.7 (1.1)* <sup>§</sup>              | <0.0001 <sup>†</sup>         |
| Triglycerides, mg/dL   | 90.0 (47.9)                       | 110 (64.7)                        | 124 (42.7)                           | 0.26 <sup>†</sup>            |
| CRP, mg/L              | 0.14 (0.1–0.4)                    | 0.97 (0.5–1.9)*                   | 0.80 (0.7–1.1)*                      | 0.0004 <sup>‡</sup>          |
| AST, U/L               | 16 (13–17)                        | 20 (16–27)*                       | 21 (18–22)*                          | 0.02 <sup>‡</sup>            |
| ALT, U/L               | 16 (11–21)                        | 22 (16–26)                        | 20 (17–35)                           | 0.06 <sup>‡</sup>            |
| HOMA-IR                | 0.8 (0.3)                         | 2.1 (0.9)                         | 8.0 (4.6)* <sup>§</sup>              | <0.0001 <sup>†</sup>         |
| M-value                | 58.3 (15.1)                       | 27.7 (12.4)*                      | 18.5 (11.4)*                         | <0.0001 <sup>†</sup>         |

Data are mean (SD) or median (Interquartile range). Group comparisons are unadjusted and were done by <sup>†</sup>one-way ANOVA with Bonferroni (normally distributed) or by <sup>‡</sup>Kruskal-Wallis with Mann-Whitney (non-normally distribution). For plasma measures, HOMA-IR and M-value Ns were N=10–13 for controls of healthy weight, N=9–17 for non-diabetics with obesity, N=13–14 for type 2 diabetics with obesity. \*P=0.02–0.0001 vs. Controls; <sup>§</sup>P=0.01–0.0001 vs. non-diabetics.

**Supplementary Table 1. Patient anthropometric and laboratorial records at baseline.**

**Supplementary Table 2. List of articles that used MRI or fMRI to evaluate hypothalamic structure and function in obesity.**

| Reference                                                | Year | Method | Stimulus           | N total | Lean | Ob/Ow | T2D | Intervention                           | Result                                                                                                           |
|----------------------------------------------------------|------|--------|--------------------|---------|------|-------|-----|----------------------------------------|------------------------------------------------------------------------------------------------------------------|
| Matsuda <i>Diabetes</i> 48:1801                          | 1999 | fMRI   | Oral glucose       | 20      | 10   | 10    | 0   | None                                   | Attenuation and retardation of glucose-induced fMRI signal the hypothalamus in obese                             |
| Smeets <i>Neuroimage</i> 24:363                          | 2005 | fMRI   | Oral glucose       | 15      | 15   | 0     | 0   | None                                   | Glucose promoted a prolonged decrease in the fMRI signal in hypothalamus/dose dependent                          |
| Vidarsdottir <i>Diabetes</i> 56:2547                     | 2007 | fMRI   | Oral glucose       | 17      | 10   | 0     | 7   | None                                   | Attenuation of glucose-induced fMRI signal in diabetes                                                           |
| Alkan <i>Magn Reson Imaging</i> 26:446                   | 2008 | MRI    | None               | 110     | 29   | 81    | 0   | None                                   | Increased MRI signal for apparent diffusion coefficient in the hypothalamus of obese                             |
| Page <i>Diabetes</i> 58:448                              | 2009 | fMRI   | Insulin/glucose    | 9       | 9    | 0     | 0   | None                                   | Increased hypothalamic fMRI signal during hypoglycemia                                                           |
| Cornier <i>PLoS One</i> 4:e6310                          | 2009 | fMRI   | Overfeeding        | 41      | 22   | 19    | 0   | None                                   | Reduction of overfeeding-induced fMRI signal in the hypothalamus in obese                                        |
| Fletcher <i>J Neurosci</i> 30:14346                      | 2010 | fMRI   | Food image cue     | 24      | 0    | 24    | 0   | Sibutramine                            | Reduction of food image-induced fMRI signal in the hypothalamus after sibutramine                                |
| van de Sande-Lee <i>Diabetes</i> 60:1699                 | 2011 | fMRI   | Oral glucose       | 21      | 8    | 13    | 0   | RYGB                                   | Attenuation of glucose-induced fMRI signal in the hypothalamus in obese; partial recovery after RYGB             |
| Teeuwisse <i>Diabetes</i> 61:3255                        | 2012 | fMRI   | Oral glucose       | 10      | 0    | 0     | 10  | Normal versus low calory diet          | Attenuation of fMRI signal in hypothalamus only after low calory diet                                            |
| Thaler <i>J Clin Invest</i> 122:153                      | 2012 | MRI    | None               | 34      | 12   | 22    | 0   | None                                   | Direct correlation between BMI and MRI signs of hypothalamic gliosis                                             |
| Hinkle <i>PLoS One</i> 8:e59114                          | 2013 | fMRI   | Leptin             | 10      | 0    | 10    | 0   | Formula for 10% reduction of body mass | Increased connectivity of hypothalamus with regions of interoceptive system after leptin                         |
| Frank <i>Int J Obes</i> 38:341                           | 2014 | fMRI   | Food image cue     | 31      | 11   | 20    | 0   | RYGB                                   | Higer hypothalamic fMRI signal after low vs. high calory food image presentation                                 |
| Wang <i>Int J Obes</i> 38:682                            | 2014 | fMRI   | Food image cue     | 40      | 0    | 40    | 0   | Naltrexone/Bupropion                   | Atenuation of food image-induced hypothalamic fMRI signal after Naltrexone/Bupropion                             |
| Lips <i>Am J Clin Nutr</i> 100:524                       | 2014 | fMRI   | Liquid meal        | 58      | 12   | 19    | 27  | None                                   | Abrogation of food intake-induced attenuation of hypothalamic connectivity with frontal regions                  |
| Heni <i>Diabetes</i> 63:4083                             | 2014 | fMRI   | Intranasal insulin | 11      | 8    | 3     | 0   | None                                   | Direct correlation between hypothalamic fMRI signal and whole body insulin sensitivity                           |
| Kilpatrick <i>Gastroenterology</i> 146:1212              | 2014 | fMRI   | Sucrose            | 22      | 11   | 11    | 0   | None                                   | Higher connectivity of hypothalamus and reward regions after sucrose in obese                                    |
| Blasco <i>Diabetes care</i> 37:3076                      | 2014 | MRI    | None               | 43      | 20   | 23    | 0   | None                                   | Higher iron load in hypothalamus of obese; positive correlation of hypothalamic iron load and insulin resistance |
| Kullmann <i>Human Brain Mapp</i> 35:6088                 | 2014 | fMRI   | None               | 48      | 25   | 23    | 0   | None                                   | Heigher baseline connectivity within the medial hypothalamus in obese                                            |
| Wijngaarden <i>Behav Brain Res</i> 287:127               | 2015 | fMRI   | Prolonged fasting  | 24      | 11   | 13    | 0   | None                                   | Attenuation of fasting-induced connectivity of the hypothalamus with cingulate cortex in obese                   |
| Puig <i>J Clin Endocrinol Metabol</i> 100:E276           | 2015 | MRI    | None               | 44      | 20   | 24    | 0   | None                                   | Attenuation of lambda1 diffusion tensor imagin in the hypothalamus in obese                                      |
| Kullman <i>Diabetes care</i> 38:1044                     | 2015 | fMRI   | Insulin            | 48      | 25   | 23    | 0   | None                                   | Inverse correlation between insulin-induced hypothalamic blood-flow and visceral adiposity                       |
| Rachid <i>Int J Obes</i> 39:1515                         | 2015 | fMRI   | Cold exposure      | 24      | 12   | 12    | 0   | RYGB                                   | Attenuation of cold-induced change in hypothalamic fMRI signal in obesity; no change after RYGB                  |
| Fernandez-Real <i>J Clin Endocrinol Metabol</i> 100:4505 | 2015 | MRI    | None               | 39      | 19   | 20    | 0   | None                                   | Gut microbiota profile clustered with hypothalamic microstructure                                                |
| Schur <i>Obesity</i> 23:2142                             | 2015 | MRI    | None               | 45      | 22   | 23    | 0   | None                                   | Direct correlation between BMI/magnitude of insulin resistance and MRI signs of hypothalamic gliosis             |
| Jastreboff <i>Diabetes</i> 65:1929                       | 2016 | fMRI   | Glucose/fructose   | 38      | 14   | 24    | 0   | None                                   | Increased hypothalamic perfusion after glucose in obese                                                          |
| Geha <i>Hum Brain Mapp</i> 38:1403                       | 2017 | fMRI   | Liquid meal        | 61      | 33   | 28    | 0   | None                                   | Reduction in liquid meal-induction of fMRI signal in hypothalamus in obese                                       |
| Jacobson <i>Perception</i> 46:283                        | 2017 | fMRI   | Sucrose            | 52      | 26   | 26    | 0   | Fasting                                | Reduced hypothalamic activation after sucrose in obese                                                           |
| Kreutzer <i>Diabetes</i> 66:2407                         | 2017 | MRI    | None               | 111     | 54   | 57    | 0   | None                                   | Increased T2 signal intensity in the left mediobasal hypothalamus in obese                                       |
| Kreutzer <i>Diabetes</i> 66:2407                         | 2017 | MRI    | None               | 10      | 0    | 10    | 0   | RYGB                                   | No change in hypothalamic T2 signal after RYGB                                                                   |
| Zoon <i>Biol Psychol</i> 137:34                          | 2018 | fMRI   | Food image cue     | 18      | 0    | 18    | 0   | RYGB                                   | Attenuation of food image-induced fMRI signal in the hypothalamus afte RYGB                                      |

The articles were selected in PubMed, in the first week of January, 2019, using the terms: magnetic resonance, MRI, fMRI, obesity, hypothalamus and neuroimaging. fMRI, functional magnetic resonance imaging; MRI, magnetic resonance imaging; Ob/Ow, obese/overweight; RYGB, Roux-in-Y gastric bypass; T2D, type 2 diabetes.

## Voxel-Based Morphometry (VBM) Results

### 1. Longitudinal Analysis (pre versus post Roux-n-Y gastric bypass surgery)

#### 1.1. Obese Diabetic Subjects (T2D)

##### 1.1.1. Whole Brain Grey Matter Analysis

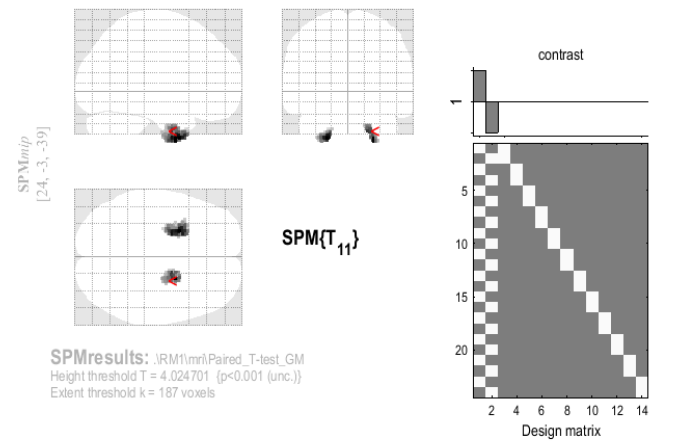

Statistics: p-values adjusted for search volume

| set-level |   | cluster-level        |                      |                |                     | peak-level           |                      |      |                     |                     | mm mm mm |    |     |
|-----------|---|----------------------|----------------------|----------------|---------------------|----------------------|----------------------|------|---------------------|---------------------|----------|----|-----|
| p         | c | P <sub>FWE-cor</sub> | q <sub>FDR-cor</sub> | k <sub>E</sub> | P <sub>uncorr</sub> | P <sub>FWE-cor</sub> | q <sub>FDR-cor</sub> | T    | (Z <sub>max</sub> ) | P <sub>uncorr</sub> |          |    |     |
| 0.004     | 2 | 0.018                | 0.014                | 272            | 0.001               | 0.671                | 0.510                | 7.30 | 4.32                | 0.000               | -24      | 6  | -48 |
|           |   |                      |                      |                |                     | 0.774                | 0.510                | 6.98 | 4.23                | 0.000               | -21      | -2 | -47 |
|           |   |                      |                      |                |                     | 0.979                | 0.510                | 5.99 | 3.92                | 0.000               | -21      | 12 | -44 |
|           |   | 0.088                | 0.036                | 187            | 0.003               | 0.676                | 0.510                | 7.29 | 4.32                | 0.000               | 24       | 2  | -48 |
|           |   |                      |                      |                |                     | 0.920                | 0.510                | 6.42 | 4.06                | 0.000               | 18       | -2 | -41 |
|           |   |                      |                      |                |                     | 1.000                | 0.590                | 5.10 | 3.58                | 0.000               | 23       | -9 | -44 |

table shows 3 local maxima more than 8.0mm apart

Height threshold: T = 4.02, p = 0.001 (1.000)  
Extent threshold: k = 187 voxels, p = 0.003 (0.088)  
Expected voxels per cluster, <math>\alpha</math> = 17.802  
Expected number of clusters, <math>\alpha</math> = 0.09  
FWEp: 11.056, FDRp: Inf, FWEc: 272, FDRc: 187

Degrees of freedom = [10, 11.0]  
FWHM = 10.39.7 10.5 mm mm mm; 6.8 6.4 7.0 (voxels)  
Volume: 1256003 = 372149 voxels = 874.2 resels  
Voxel size: 1.5 1.5 1.5 mm mm mm; (resel = 309.20 voxels)

**Supplementary Figure 1:** Pre- versus post-operative grey matter density reduction in T2D subjects. Paired T-test (uncorrected  $p < 0.001$ , showing only FDR cluster level significant results), showing reduction of grey matter density in the temporal poles.

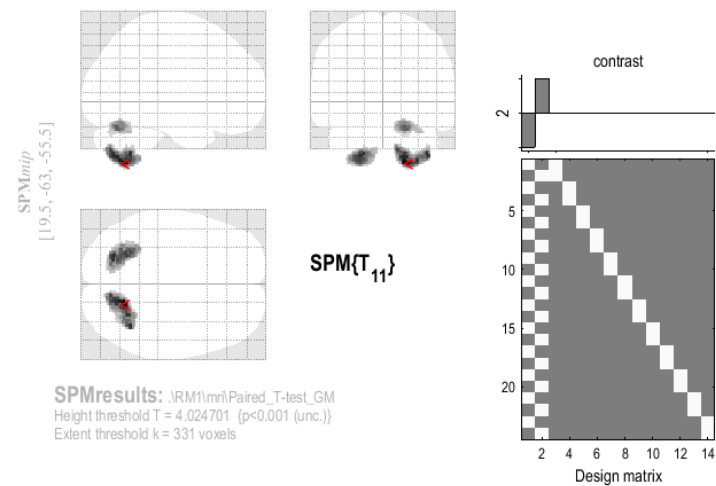

SPMresults: JRM1\mr\Paired\_T-test\_GM  
 Height threshold T = 4.024701 (p<0.001 (unc.))  
 Extent threshold k = 331 voxels

Statistics: p-values adjusted for search volume

| set-level |   | cluster-level         |                       |                |                     | peak-level            |                       |      |                     |                     | mm mm mm |     |     |
|-----------|---|-----------------------|-----------------------|----------------|---------------------|-----------------------|-----------------------|------|---------------------|---------------------|----------|-----|-----|
| p         | c | P <sub>FWE-corr</sub> | q <sub>FDR-corr</sub> | k <sub>E</sub> | P <sub>uncorr</sub> | P <sub>FWE-corr</sub> | q <sub>FDR-corr</sub> | T    | (Z <sub>max</sub> ) | P <sub>uncorr</sub> |          |     |     |
| 0.000     | 3 | 0.000                 | 0.000                 | 887            | 0.000               | 0.249                 | 0.333                 | 8.91 | 4.72                | 0.000               | 20       | -63 | -56 |
|           |   |                       |                       |                |                     | 0.469                 | 0.333                 | 7.94 | 4.49                | 0.000               | 17       | -69 | -51 |
|           |   |                       |                       |                |                     | 0.528                 | 0.333                 | 7.74 | 4.44                | 0.000               | 39       | -56 | -48 |
|           |   | 0.000                 | 0.000                 | 798            | 0.000               | 0.532                 | 0.333                 | 7.73 | 4.44                | 0.000               | -23      | -72 | -50 |
|           |   |                       |                       |                |                     | 0.633                 | 0.333                 | 7.42 | 4.35                | 0.000               | -24      | -60 | -54 |
|           |   |                       |                       |                |                     | 0.875                 | 0.333                 | 6.63 | 4.12                | 0.000               | -29      | -53 | -53 |
|           |   | 0.004                 | 0.002                 | 351            | 0.000               | 0.834                 | 0.333                 | 6.78 | 4.17                | 0.000               | 18       | -69 | -24 |
|           |   |                       |                       |                |                     | 0.997                 | 0.474                 | 5.60 | 3.78                | 0.000               | 23       | -62 | -24 |
|           |   |                       |                       |                |                     | 1.000                 | 0.648                 | 4.89 | 3.49                | 0.000               | 32       | -57 | -29 |

table shows 3 local maxima more than 8.0mm apart

Height threshold: T = 4.02, p = 0.001 (1.000)      Degrees of freedom = [1.0, 11.0]  
 Extent threshold: k = 331 voxels, p = 0.000 (0.006)      FWHM = 10.39.7 10.5 mm mm mm; 6.8 6.4 7.0 (voxels)  
 Expected voxels per cluster, <k> = 17.802      Volume: 1256003 = 372149 voxels = 874.2 resels  
 Expected number of clusters, <c> = 0.01      Voxel size: 1.5 1.5 1.5 mm mm mm; (resel = 309.20 voxels)  
 FWEp: 11.056, FDRp: Inf, FWEc: 311, FDRc: 311

**Supplementary Figure 2:** Pre- versus post-operative increased grey matter density in T2D subjects. Paired T-test (uncorrected p<0.001. showing only FDR cluster level significant results), showing grey matter density increases in cerebellar areas.

### 1.1.2. Whole Brain White Matter Analysis

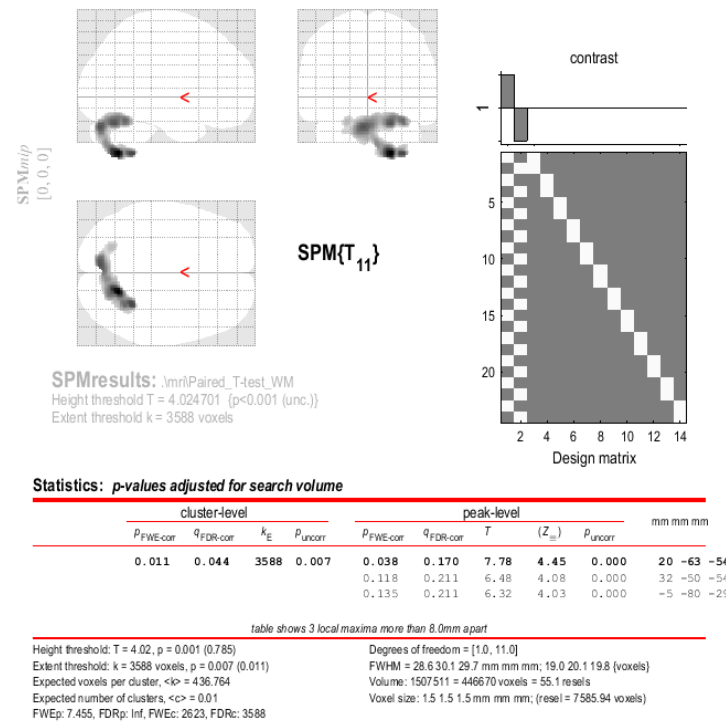

**Supplementary Figure 3:** Pre- versus post-operative white matter density reduction in T2D subjects. Paired T-test (uncorrected p<0.001, showing only FDR cluster level significant results) showing reduced white matter density in cerebellar areas.

No results observed in the opposite direction (There was no white matter density increase in the post-operative period).

### 1.1.3. Hypothalamus restricted GM Analysis

There were no differences between pre- and post-operative MRIs.

## 1.2. Non-diabetes obesity Group (ND) pre versus post Roux-n-Y gastric bypass surgery

### 1.2.1. Whole Brain Grey Matter Analysis

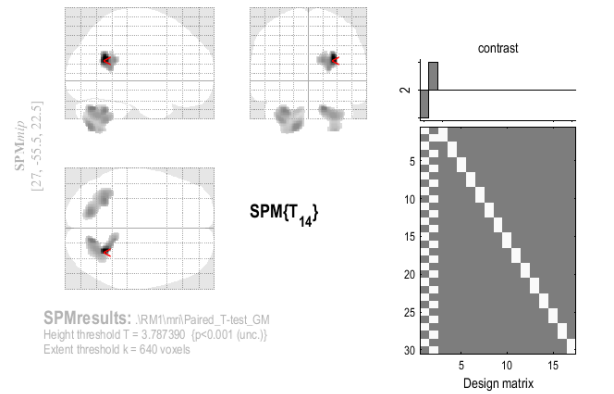

Statistics: *p-values adjusted for search volume*

| set-level |          | cluster-level              |                            |                      |                           | peak-level                 |                            |          |                          |                           | mm mm mm |     |     |
|-----------|----------|----------------------------|----------------------------|----------------------|---------------------------|----------------------------|----------------------------|----------|--------------------------|---------------------------|----------|-----|-----|
| <i>P</i>  | <i>c</i> | <i>P<sub>FWE-cor</sub></i> | <i>q<sub>FDR-cor</sub></i> | <i>k<sub>E</sub></i> | <i>P<sub>uncorr</sub></i> | <i>P<sub>FWE-cor</sub></i> | <i>q<sub>FDR-cor</sub></i> | <i>T</i> | <i>(Z<sub>max</sub>)</i> | <i>P<sub>uncorr</sub></i> |          |     |     |
| 0.000     | 3        | 0.041                      | 0.026                      | 640                  | 0.005                     | 0.011                      | 0.036                      | 9.44     | 5.21                     | 0.000                     | 27       | -56 | 23  |
|           |          |                            |                            |                      |                           | 0.474                      | 0.341                      | 5.82     | 4.08                     | 0.000                     | 15       | -45 | 21  |
|           |          |                            |                            |                      |                           | 0.522                      | 0.341                      | 5.71     | 4.04                     | 0.000                     | 21       | -60 | 14  |
|           |          | 0.001                      | 0.001                      | 1434                 | 0.000                     | 0.312                      | 0.341                      | 6.26     | 4.25                     | 0.000                     | 17       | -71 | -33 |
|           |          |                            |                            |                      |                           | 0.641                      | 0.343                      | 5.45     | 3.93                     | 0.000                     | 27       | -63 | -41 |
|           |          |                            |                            |                      |                           | 0.869                      | 0.598                      | 4.92     | 3.69                     | 0.000                     | 29       | -63 | -56 |
|           |          | 0.000                      | 0.000                      | 2209                 | 0.000                     | 0.416                      | 0.341                      | 5.96     | 4.14                     | 0.000                     | -30      | -56 | -35 |
|           |          |                            |                            |                      |                           | 0.466                      | 0.341                      | 5.84     | 4.09                     | 0.000                     | -17      | -74 | -53 |
|           |          |                            |                            |                      |                           | 0.599                      | 0.343                      | 5.54     | 3.97                     | 0.000                     | -33      | -56 | -45 |

table shows 3 local maxima more than 8.0mm apart

Height threshold:  $T = 3.79$ ,  $p = 0.001$  (1.000) Degrees of freedom = [10, 14.0]  
 Extent threshold:  $k = 640$  voxels,  $p = 0.005$  (0.041) FWHM = 14.8 16.2 14.3 mm mm mm; 9.9 10.8 9.5 (voxels)  
 Expected voxels per cluster:  $< \sigma > = 68.994$  Volume: 1622471 = 480732 voxels = 441.4 resels  
 Expected number of clusters:  $< c > = 0.04$  Voxel size: 1.5 1.5 1.5 mm mm mm; (resel) = 1014.34 voxels  
 FWEp: 7.960, FDRp: 9.437, FWEc: 640, FDRc: 640

**Supplementary Figure 4:** Pre- versus post-operative increased grey matter density in the non-diabetes obese group (ND). Paired T-test (uncorrected  $p < 0.001$ , showing only FDR cluster level significant results) showing increased grey matter density in the right precuneus and bilateral cerebellum.

There was no grey matter density reduction comparing pre- and post-operative MRIs

## 1.2.2. Whole Brain White Matter Analysis

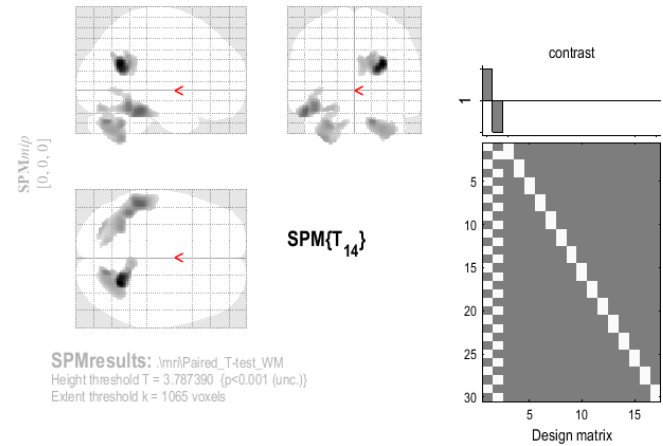

Statistics: *p-values adjusted for search volume*

| set-level |     | cluster-level  |                |       |              | peak-level     |                |      |             |              | mm mm mm |     |     |
|-----------|-----|----------------|----------------|-------|--------------|----------------|----------------|------|-------------|--------------|----------|-----|-----|
| $p$       | $c$ | $P_{FWE-corr}$ | $q_{FDR-corr}$ | $k_E$ | $P_{uncorr}$ | $P_{FWE-corr}$ | $q_{FDR-corr}$ | $T$  | $(Z_{max})$ | $P_{uncorr}$ |          |     |     |
| 0.000     | 3   | 0.003          | 0.006          | 1206  | 0.001        | 0.004          | 0.040          | 9.96 | 5.33        | 0.000        | 27       | -57 | 24  |
|           |     |                |                |       |              | 0.336          | 0.396          | 5.87 | 4.10        | 0.000        | 15       | -48 | 24  |
|           |     |                |                |       |              | 0.731          | 0.531          | 4.96 | 3.71        | 0.000        | 8        | -45 | 23  |
|           |     | 0.000          | 0.000          | 3071  | 0.000        | 0.074          | 0.234          | 7.25 | 4.60        | 0.000        | -51      | -38 | -21 |
|           |     |                |                |       |              | 0.169          | 0.336          | 6.51 | 4.35        | 0.000        | -42      | -48 | -20 |
|           |     |                |                |       |              | 0.378          | 0.396          | 5.75 | 4.06        | 0.000        | -29      | -56 | -35 |
|           |     | 0.006          | 0.008          | 1065  | 0.001        | 0.201          | 0.338          | 6.36 | 4.29        | 0.000        | 17       | -71 | -33 |
|           |     |                |                |       |              | 0.497          | 0.396          | 5.46 | 3.93        | 0.000        | 27       | -65 | -41 |

table shows 3 local maxima more than 8.0mm apart

Height threshold:  $T = 3.79$ ,  $p = 0.001$  (0.997)      Degrees of freedom = [10, 14.0]  
 Extent threshold:  $k = 1065$  voxels,  $p = 0.001$  (0.006)      FWHM = 15.8 16.9 14.4 mm mm mm; 10.5 11.3 9.6 (voxels)  
 Expected voxels per cluster,  $\langle k \rangle = 77.786$       Volume: 1221065 = 361797 voxels = 293.1 resels  
 Expected number of clusters,  $\langle c \rangle = 0.01$       Voxel size: 1.5 1.5 1.5 mm mm mm; (resel = 1143.61 voxels)  
 FWEp: 7.608, FDRp: 9.133, FWEc: 1065, FDRc: 1065

**Supplementary Figure 5:** Pre- versus post-operative white matter density reduction in ND group. Paired T-test (uncorrected  $p < 0.001$ . showing only FDR cluster level significant results) showing reduced white matter density in the right precuneus, inferior temporal gyrus and right cerebellum.

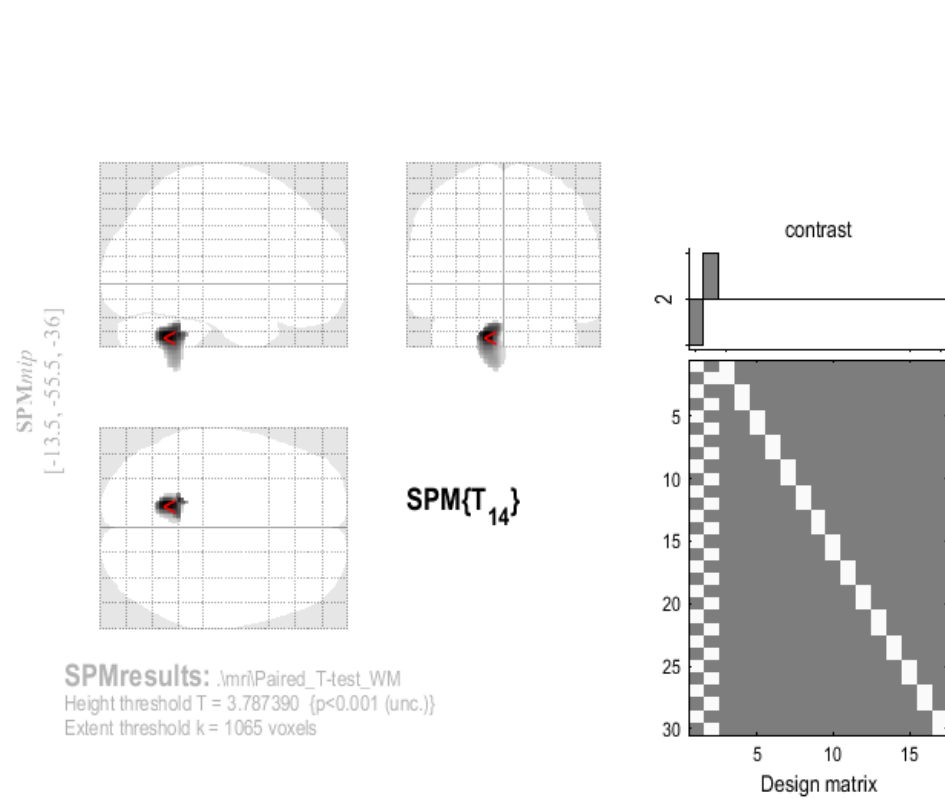

**SPMresults:** .\mriPaired\_T-test\_WM  
Height threshold  $T = 3.787390$  ( $p < 0.001$  (unc.))  
Extent threshold  $k = 1065$  voxels

**Statistics:  $p$ -values adjusted for search volume**

| cluster-level  |                |       |              | peak-level     |                |      |                    |              | mm mm mm |     |     |
|----------------|----------------|-------|--------------|----------------|----------------|------|--------------------|--------------|----------|-----|-----|
| $P_{FWE-corr}$ | $q_{FDR-corr}$ | $k_E$ | $P_{uncorr}$ | $P_{FWE-corr}$ | $q_{FDR-corr}$ | $T$  | $(Z_{\text{max}})$ | $P_{uncorr}$ |          |     |     |
| 0.002          | 0.012          | 1292  | 0.000        | 0.375          | 0.396          | 5.76 | 4.06               | 0.000        | -14      | -56 | -36 |
|                |                |       |              | 0.541          | 0.408          | 5.36 | 3.89               | 0.000        | -17      | -47 | -36 |

table shows 3 local maxima more than 8.0mm apart

Height threshold:  $T = 3.79$ ,  $p = 0.001$  (0.997)  
Extent threshold:  $k = 1065$  voxels,  $p = 0.001$  (0.006)  
Expected voxels per cluster,  $<k> = 77.786$   
Expected number of clusters,  $<c> = 0.01$   
FWEp: 7.608, FDRp: Inf, FWEc: 1040, FDRc: 1040

Degrees of freedom = [1.0, 14.0]  
FWHM = 15.8 16.9 14.4 mm mm mm; 10.5 11.3 9.6 (voxels)  
Volume: 1221065 = 361797 voxels = 293.1 resels  
Voxel size: 1.5 1.5 1.5 mm mm mm; (resel = 1143.61 voxels)



**Supplementary Figure 6:** Pre- *versus* post-operative white matter density increase in ND group. Paired T-test (uncorrected  $p < 0.001$ . showing only FDR cluster level significant results) showing increase white matter density in the left cerebellum.

**1.2.3. VBM ROI analyses including only the hypothalamic area, comparing GM density between pre and post Roux-n-Y gastric bypass surgery**

There were no differences between pre- and post-operative MRIs.

## **2. Transversal Analysis of pre-operative MRIs (pairwise comparisons between all groups)**

### **2.1. Whole Brain Grey Matter Analysis**

There were no differences in these analyses.

### **2.2. Whole Brain White Matter Analysis**

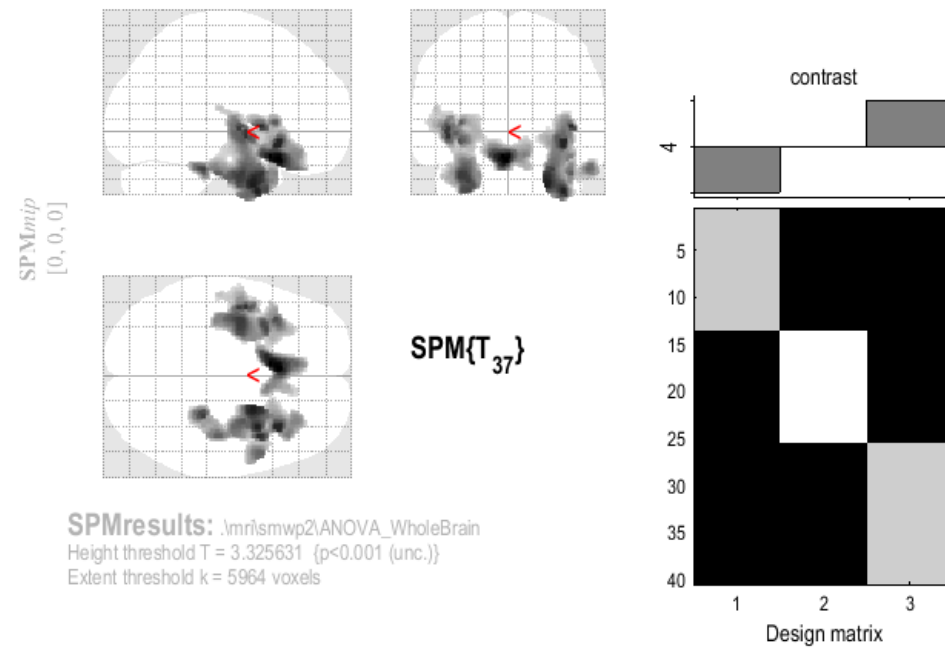

**Statistics: p-values adjusted for search volume**

| set-level |   | cluster-level         |                       |                |                     | peak-level            |                       |      |                   |                     | mm mm mm |    |     |
|-----------|---|-----------------------|-----------------------|----------------|---------------------|-----------------------|-----------------------|------|-------------------|---------------------|----------|----|-----|
| p         | c | p <sub>FWE-corr</sub> | q <sub>FDR-corr</sub> | k <sub>E</sub> | p <sub>uncorr</sub> | p <sub>FWE-corr</sub> | q <sub>FDR-corr</sub> | T    | (Z <sub>≡</sub> ) | p <sub>uncorr</sub> |          |    |     |
| 0.000     | 2 | 0.000                 | 0.000                 | 5969           | 0.000               | 0.037                 | 0.438                 | 5.21 | 4.48              | 0.000               | -3       | 20 | -20 |
|           |   |                       |                       |                |                     | 0.118                 | 0.438                 | 4.73 | 4.15              | 0.000               | -44      | -3 | -5  |
|           |   |                       |                       |                |                     | 0.138                 | 0.438                 | 4.66 | 4.11              | 0.000               | -33      | -8 | -32 |
|           |   | 0.000                 | 0.000                 | 5964           | 0.000               | 0.075                 | 0.438                 | 4.92 | 4.29              | 0.000               | 24       | 2  | -38 |
|           |   |                       |                       |                |                     | 0.083                 | 0.438                 | 4.88 | 4.26              | 0.000               | 36       | 5  | -42 |
|           |   |                       |                       |                |                     | 0.083                 | 0.438                 | 4.87 | 4.26              | 0.000               | 36       | 18 | -11 |

table shows 3 local maxima more than 8.0mm apart

Height threshold: T = 3.33, p = 0.001 (0.949)  
Extent threshold: k = 5964 voxels, p = 0.000 (0.000)  
Expected voxels per cluster, <k> = 200.407  
Expected number of clusters, <c> = 0.00  
FWEp: 5.084, FDRp: Inf, FWEc: 5964, FDRc: 5964

Degrees of freedom = [1.0, 37.0]  
FWHM = 19.7 18.8 18.8 mm mm mm; 13.2 12.5 12.5 {voxels}  
Volume: 1438094 = 426102 voxels = 191.5 resels  
Voxel size: 1.5 1.5 1.5 mm mm mm; (resel = 2065.02 voxels)

**Supplementary Figure 7:** White matter density increases in ND group compared to controls. ANOVA test (uncorrected  $p < 0.001$ . showing only FDR cluster level significant results).

There was no reduction of white matter densities comparing controls and T2D.

### **2.3. ROI analyses of Hypothalamus (GM Analysis)**

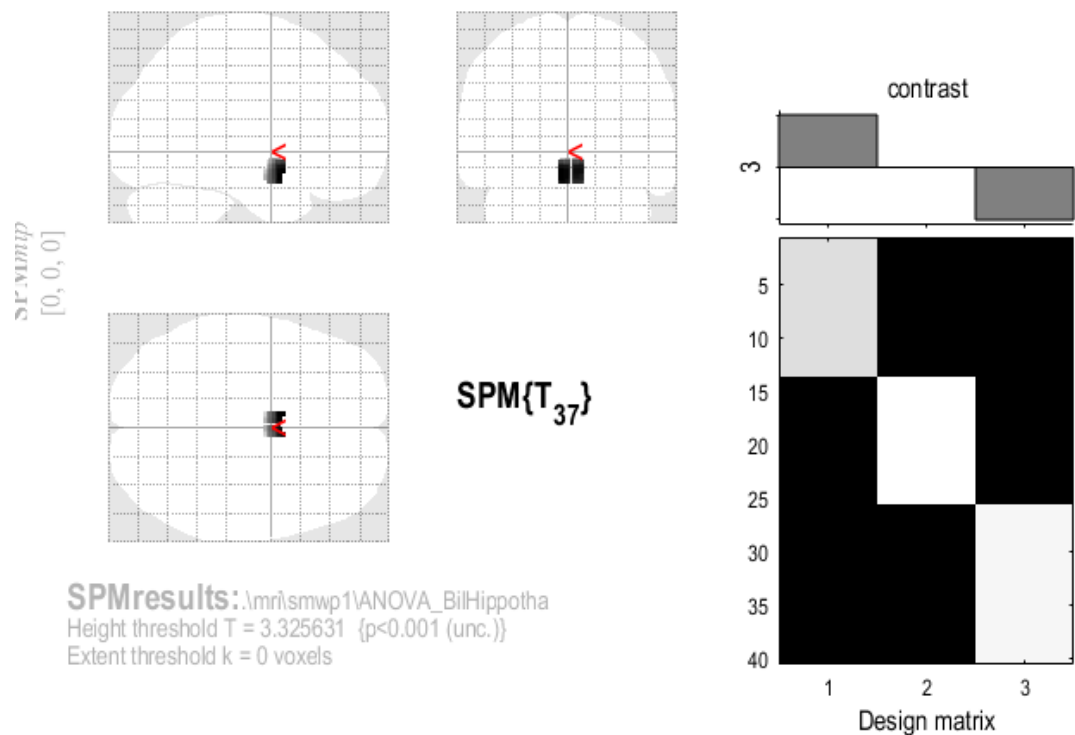

**Statistics: p-values adjusted for search volume**

| set-level |     | cluster-level  |                |       |              | peak-level     |                |       |                |              | mm mm mm |   |     |
|-----------|-----|----------------|----------------|-------|--------------|----------------|----------------|-------|----------------|--------------|----------|---|-----|
| $p$       | $c$ | $p_{FWE-corr}$ | $q_{FDR-corr}$ | $k_E$ | $p_{uncorr}$ | $p_{FWE-corr}$ | $q_{FDR-corr}$ | $T$   | $(Z_{\equiv})$ | $p_{uncorr}$ |          |   |     |
| 0.000     | 2   | 0.010          | 0.378          | 149   | 0.378        | 0.000          | 0.000          | 21.01 | Inf            | 0.000        | -6       | 3 | -18 |
|           |     | 0.009          | 0.378          | 157   | 0.366        | 0.000          | 0.000          | 19.73 | Inf            | 0.000        | 6        | 5 | -14 |

table shows 3 local maxima more than 8.0mm apart

Height threshold:  $T = 3.33$ ,  $p = 0.001$  (0.025)  
 Extent threshold:  $k = 0$  voxels  
 Expected voxels per cluster,  $\langle c \rangle = 206.827$   
 Expected number of clusters,  $\langle c \rangle = 0.03$   
 FWEp: 3.013, FDRp: 20.818, FWEc: 149, FDRc: Inf

Degrees of freedom = [1.0, 37.0]  
 FWHM = 21.2 15.9 21.4 mm mm mm; 14.1 10.6 14.3 {voxels}  
 Volume: 2464 = 730 voxels = 0.2 resels  
 Voxel size: 1.5 1.5 1.5 mm mm mm; (resel = 2131.17 voxels)

**Supplementary Figure 8:** Grey matter density reduction in the ND group compared to controls. ANOVA test (uncorrected  $p < 0.001$ ). We found areas of decrease grey matter in the dorsal-superior hypothalamic areas.

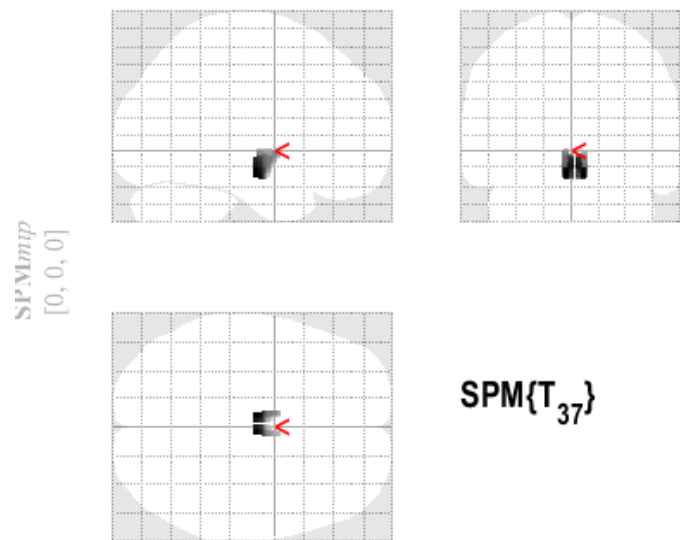

**SPMresults:** .\mri\smwp1\ANOVA\_BilHippotha  
 Height threshold T = 3.325631 {p<0.001 (unc.)}  
 Extent threshold k = 0 voxels

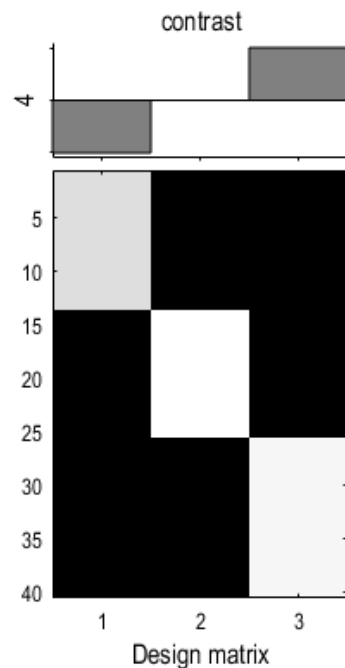

**Statistics: p-values adjusted for search volume**

| set-level |   | cluster-level         |                       |                |                     | peak-level            |                       |       |                   |                     | mm mm mm |     |     |
|-----------|---|-----------------------|-----------------------|----------------|---------------------|-----------------------|-----------------------|-------|-------------------|---------------------|----------|-----|-----|
| p         | c | p <sub>FWE-corr</sub> | q <sub>FDR-corr</sub> | k <sub>E</sub> | p <sub>uncorr</sub> | p <sub>FWE-corr</sub> | q <sub>FDR-corr</sub> | T     | (Z <sub>≡</sub> ) | p <sub>uncorr</sub> |          |     |     |
| 0.000     | 2 | 0.009                 | 0.366                 | 173            | 0.342               | 0.000                 | 0.000                 | 37.05 | Inf               | 0.000               | -5       | -14 | -17 |
|           |   |                       |                       |                |                     | 0.000                 | 0.000                 | 20.69 | Inf               | 0.000               | -5       | -8  | -8  |
|           |   | 0.009                 | 0.366                 | 157            | 0.366               | 0.000                 | 0.000                 | 35.97 | Inf               | 0.000               | 5        | -14 | -17 |
|           |   |                       |                       |                |                     | 0.000                 | 0.000                 | 14.22 | Inf               | 0.000               | 6        | -5  | -8  |
|           |   |                       |                       |                |                     | 0.000                 | 0.000                 | 10.80 | 7.21              | 0.000               | 5        | -12 | -3  |

table shows 3 local maxima more than 8.0mm apart

Height threshold: T = 3.33, p = 0.001 (0.025)  
 Extent threshold: k = 0 voxels  
 Expected voxels per cluster, <k> = 206.827  
 Expected number of clusters, <c> = 0.03  
 FWEp: 3.013, FDRp: 10.796, FWEc: 157, FDRc: Inf

Degrees of freedom = [1.0, 37.0]  
 FWHM = 21.2 15.9 21.4 mm mm mm; 14.1 10.6 14.3 {voxels}  
 Volume: 2464 = 730 voxels = 0.2 resels  
 Voxel size: 1.5 1.5 1.5 mm mm mm; (resel = 2131.17 voxels)



**Supplementary Figure 9:** Grey matter density increase in the ND group compared to controls. ANOVA test (uncorrected  $p < 0.001$ ). We found areas of increased grey matter in the ventral hypothalamus.

There were no differences in the comparisons between controls and T2D nor between ND and T2D groups.
